# Supplementary material
Source: PubMed Central journal article supplement (PMC4295925)
Supplement: NIHMS654396-supplement-Supplement.pdf [file NIHMS654396-supplement-Supplement.pdf]

**Supp. Table S1. *NEB* variants identified in 143 nemaline myopathy families**

| Family ID                                              | Exon/Intron; variant in cDNA; in protein sequence                                                                                                          | Additional details    |
|--------------------------------------------------------|------------------------------------------------------------------------------------------------------------------------------------------------------------|-----------------------|
| <b>A: Families with the severe form of NM (n = 24)</b> |                                                                                                                                                            |                       |
| F25 cons                                               | int18; c.1675-2A>G; p.?                                                                                                                                    | HOZ                   |
| F367 cons                                              | int32; c.3255+2dup; p.?                                                                                                                                    | HOZ                   |
| F407 cons                                              | ex173; c.24475_24479dup; p.Asn8160fs                                                                                                                       | HOZ , ALT3            |
| F88 cons                                               | ex180; c.25200del; p.Phe8400fs <sup>B-Fam13, D-Fam4</sup>                                                                                                  | HOZ                   |
| F34 cons                                               | del ex55; c.7431+1916_7536+372del, p.Arg2478_Asp2512del <sup>F-Pat7, Q-Pat2</sup>                                                                          | HOZ, Ashk. 2.5 kb del |
| F105 cons                                              | del ex55; c.7431+1916_7536+372del, p.Arg2478_Asp2512del <sup>C, F-Pat2</sup>                                                                               | HOZ, Ashk. 2.5 kb del |
| F326                                                   | del ex55; c.7431+1916_7536+372del, p.Arg2478_Asp2512del <sup>F-Pat14</sup><br>ex132; c.20213dup; p.Asp6738fs                                               | Ashk. 2.5 kb del      |
| F370                                                   | del ex55; c.7431+1916_7536+372del, p.Arg2478_Asp2512del <sup>L-Pat2</sup><br>int108; c.17118+1G>C; p.? <sup>L-Pat2</sup>                                   | Ashk. 2.5 kb del      |
| F374                                                   | ex120; c.18808C>T; p.Arg6270* <sup>L-Pat3</sup><br>del ex55; c.7431+1916_7536+372del, p.Arg2478_Asp2512del <sup>L-Pat3</sup>                               |                       |
| F181                                                   | del 5'end-ex24; Chr2.hg19:g.(152,545,083_152,545,531)_(152,599,010_152,608,650)del <sup>P-Fam3</sup><br>ex129; c.19913G>C; p.Arg6638Pro <sup>D-Fam55</sup> | 53-64 kb del          |
| Bos227-1                                               | ex57; c.7647A>G; p.Tyr2549*<br>ex64; c.9046C>T; p.Arg3016*                                                                                                 | ALT1                  |
| F47                                                    | int32; c.3255+1G>T; p.? <sup>D-Fam53</sup><br>ex8; c.549C>A; p.Tyr183* <sup>D-Fam53</sup>                                                                  |                       |
| F383                                                   | ex107; c.16921G>T; p.Glu5641* <sup>K</sup><br>int32; c.3255+1G>A; p.? <sup>K</sup>                                                                         |                       |
| BOS-32                                                 | int32; c.3255+1G>A; p.?<br>ex136; c.C20659T; p.Arg6887*                                                                                                    |                       |
| F51                                                    | int4; c.78+1G>A; p.?                                                                                                                                       |                       |

| Family ID                                                                                  | Exon/Intron; variant in cDNA; in protein sequence                                                                        | Additional details    |
|--------------------------------------------------------------------------------------------|--------------------------------------------------------------------------------------------------------------------------|-----------------------|
|                                                                                            | int36; c.3987+1_+2inv; p.?                                                                                               |                       |
| F109                                                                                       | ex81; c.12048_12049del; p.Lys4016fs <sup>H</sup><br>int13; c.1152+1G>T; p.? <sup>H</sup>                                 |                       |
| F110                                                                                       | ex28; c.2827C>T; p.Gln943*<br>int145; c.21628-2A>T; p.?                                                                  |                       |
| F121                                                                                       | int81; c.12330+5G>A; p.? <sup>D-Fam5</sup><br>ex139; c.20975_20976del; p.Lys6992fs <sup>D-Fam5</sup>                     |                       |
| F134                                                                                       | ex180; c.25205_25206del; p.Tyr8402* <sup>B-Fam12</sup><br>ex33; c.3473_3488del; p.Asn1187fs <sup>D-Fam1</sup>            |                       |
| F146                                                                                       | int147; c.21840+5_+13del; p.? <sup>B-Fam1, D-Fam2</sup><br>ex148; c.21898C>T; p.Arg7300* <sup>B-Fam1, D-Fam2</sup>       |                       |
| F207                                                                                       | int132; c.20262+5G>A; p.? <sup>H</sup> int11; c.928-7_-5del; p.?                                                         |                       |
| F375                                                                                       | ex9; c.694del; p.Gln232fs<br>ex58; c.7964A>G; p.Tyr2655Cys                                                               |                       |
| G17539                                                                                     | int58; c.8160+1G>A; p.Asn2653_His2720del <sup>M-Pat2</sup><br>ex46; c.5783_5784del; p.Tyr1928fs <sup>M-Pat2</sup>        |                       |
| G21781                                                                                     | ex45; c.5574C>G; p.Tyr1858* <sup>M-Pat1, Q-P1</sup><br>int122; c.19101+5G>A; p.? <sup>M-Pat1, Q-P1</sup>                 |                       |
| <b>B: Families with the intermediate form of NM (n = 15), * sib has typical form of NM</b> |                                                                                                                          |                       |
| F178 cons *                                                                                | del ex55; c.7431+1916_7536+372del, p.Arg2478_Asp2512del <sup>C, F-Fam3</sup>                                             | HOZ, Ashk. 2.5 kb del |
| G22593 cons                                                                                | ex174; c.24541_24544dup; p.Val8182fs <sup>Q-P9</sup>                                                                     | HOZ, ALT3             |
| G36659 cons                                                                                | ex177; c.24735_24736del; p.Ala8246* <sup>Q-P7</sup>                                                                      | HOZ, ALT3             |
| F263                                                                                       | int4; c.78+1G>A; p.? <sup>F-Fam11</sup><br>del ex55; c.7431+1916_7536+372del, p.Arg2478_Asp2512del <sup>F-Fam11</sup>    | Ashk. 2.5 kb del      |
| F148                                                                                       | int23; c.2212-1G>C; p.? <sup>D-Fam10</sup><br>del ex55; c.7431+1916_7536+372del, p.Arg2478_Asp2512del <sup>F-Fam10</sup> | Ashk. 2.5 kb del      |
| P8                                                                                         | ex139; c.20928G>T; p.Gly6976 <sup>Q-P8</sup>                                                                             |                       |

| Family ID                                                                                   | Exon/Intron; variant in cDNA; in protein sequence                                                            | Additional details    |
|---------------------------------------------------------------------------------------------|--------------------------------------------------------------------------------------------------------------|-----------------------|
|                                                                                             | ex172; c.24274del; p.Arg8125fs <sup>Q-P8</sup>                                                               | ALT3                  |
| SYD-F1*                                                                                     | ex173; c.24407_24410dup; p.Leu8137fs                                                                         | ALT3                  |
| F176                                                                                        | ex163; c.23521C>T; p.Gln7841* <sup>D-Fam12</sup><br>ex122; c.19097G>T; p.Ser6366Ile <sup>D-Fam12</sup>       | FIN1                  |
| TRE-F1                                                                                      | ex122; c.19097G>T; p.Ser6366Ile<br>ex42; c.5061G>A p.Trp1687*                                                | FIN1                  |
| F1 *                                                                                        | ex151; c.22249A>C; p.Thr7417Pro <sup>B-Fam2</sup><br>ex122; c.19048_19057del; p.Thr6350fs <sup>D-Fam13</sup> | FIN2<br>FIN3          |
| F8                                                                                          | ex122; c.19048_19057del; p.Thr6350fs <sup>D-Fam30</sup><br>int32; c.3255+1G>A; p.? <sup>D-Fam30</sup>        | FIN3                  |
| F77 *                                                                                       | ex58; c.7964A>G; p.Tyr2655Cys<br>ex78; c.11628G>A; p.Trp3876*                                                |                       |
| F17                                                                                         | int36; c.3987+1G>A; p.?<br>ex138; c.20845dup; p.Thr6949fs                                                    |                       |
| F332                                                                                        | int36; c.3987+1G>A; p.?<br>ex7; c.412C>T; p.Arg138*                                                          |                       |
| F60                                                                                         | ex135; c.20554G>T; p.Glu6852*<br>ex180; c.25241T>G; p.Leu8414*                                               |                       |
| <b>C: Families with the typical form of NM (n = 51) , * sib has intermediate form of NM</b> |                                                                                                              |                       |
| F117 cons                                                                                   | int32; c.3255+1G>T; p.? <sup>D-Fam14</sup>                                                                   | HOZ                   |
| F300 cons                                                                                   | int60; c.8373+5G>A; p.?                                                                                      | HOZ                   |
| F94 cons                                                                                    | ex154; c.22584G>C; p.Gln7528His <sup>A-Fam4, D-Fam21</sup>                                                   | HOZ                   |
| F119 cons                                                                                   | ex181; c.25279G>T; p.Glu8427* <sup>A-Fam5, D-Fam23</sup>                                                     | HOZ                   |
| F178 cons*                                                                                  | del ex55; c.7431+1916_7536+372del, p.Arg2478_Asp2512del <sup>C, F-Fam3</sup>                                 | HOZ, Ashk. 2.5 kb del |
| SYD-F1*                                                                                     | ex173; c.24407_24410dup; p.Leu8137fs                                                                         | HOZ ALT3              |
| F328 cons                                                                                   | ex173; c.2444dup; p.Pro8147fs                                                                                | HOZ, ALT3             |
| AG-F1                                                                                       | ex172; c.24355_24358dup; p.Thr8120fs <sup>O</sup>                                                            | ALT3                  |

| Family ID | Exon/Intron; variant in cDNA; in protein sequence                                                                             | Additional details |
|-----------|-------------------------------------------------------------------------------------------------------------------------------|--------------------|
|           | ex175; c.24632_24633del; p.Pro8211fs <sup>O</sup>                                                                             | ALT3               |
| F4        | int65; c.9414+1G>T, p.?<br>ex61; c.8381A>T; p.Tyr2794Phe                                                                      | ALT1               |
| F318      | ex173; c.24480_24483del; p.Gln8161fs<br>del ex73-int73; c.10798_10872+839del; p.?                                             | ALT3<br>1 kb del   |
| F340      | ex49; c.6385C>T; p.Gln2129*<br>ex172; c.24370_24373del; p.Val8126fs                                                           | ALT3               |
| SYD-F2    | ex172; c.24372_24375del; p.Arg8125fs<br>ex142; c.21210T>A, p.Tyr7070*                                                         | ALT3               |
| SYD-F3    | ex172; c.24314_24317dup, p.Tyr8107fs<br>ex14; c.1172_1173del, p.Tyr391*                                                       | ALT3               |
| F349      | ex175; c.24684G>A; p.?<br>ex119; c.18676C>T; p.Gln6226*                                                                       | ALT3               |
| G19106    | ex175; c.24684G>A; p.? <sup>Q-P11</sup><br>ex119; c.18676C>T; p.Gln6226* <sup>Q-P11</sup>                                     | ALT3               |
| F238      | int17; c.1569+1G>A; p.? <sup>Q-P14</sup><br>ex176; c.24711del; p.Ala8238fs <sup>Q-P14</sup>                                   | ALT3               |
| F305      | int32; c.3255+1G>T; p.?<br>int83/91/99; c.12639+3_+6delAAGT; p.?                                                              | TRI                |
| F160      | del ex55; c.7431+1916_7536+372del, p.Arg2478_Asp2512del <sup>F-Fam12</sup><br>int79; c.11910+5G>C; p.? <sup>D-Fam17</sup>     | Ashk. 2.5 kb del   |
| F229      | del ex55; c.7431+1916_7536+372del, p.Arg2478_Asp2512del <sup>F-Fam13</sup><br>int151; c.22266+1_+9del; p.? <sup>D-Fam52</sup> | Ashk. 2.5 kb del   |
| F211      | ex155; c.22489C>T; p.Arg7497*<br>del ex43-45; c.5238+335_5764-407del; p.Arg1747_Asp1921del                                    | 2.2 kb del         |
| F45       | int36; c.3987+1_+2inv; p.? <sup>D-Fam24</sup><br>del ex53-54; c.6916-163_7431+211del; p.Tyr2306_Asp2477del <sup>L-Fam4</sup>  | 1 kb del           |
| F9        | ex163; c.23500_23503dup; p.Leu7835fs <sup>A-Fam2</sup>                                                                        |                    |

| Family ID | Exon/Intron; variant in cDNA; in protein sequence                                                            | Additional details |
|-----------|--------------------------------------------------------------------------------------------------------------|--------------------|
|           | ex122; c.19097G>T; p.Ser6366Ile <sup>D-Fam31</sup>                                                           | FIN1               |
| F11       | ex122; c.19097G>T; p.Ser6366Ile <sup>D-Fam36</sup><br>ex75; c.11164C>T; p.Arg3722*                           | FIN1               |
| F3        | ex136; c.20665C>T; p.Gln6889*<br>ex122; c.19097G>T; p.Ser6366Ile <sup>D-Fam35</sup>                          | FIN1               |
| F298      | ex122; c.19097G>T; p.Ser6366Ile <sup>D-Fam37</sup><br>ex50; c.6678del; p.Lys2226fs                           | FIN1               |
| F1*       | ex151; c.22249A>C; p.Thr7417Pro <sup>B-Fam2</sup><br>ex122; c.19048_19057del; p.Thr6350fs <sup>D-Fam13</sup> | FIN2<br>FIN3       |
| F12       | ex61; c.8392_8395dup; p.Arg2799fs <sup>D-Fam32</sup><br>ex151; c.22249A>C; p.Thr7417Pro <sup>B-Fam3</sup>    | FIN2               |
| F5        | ex75; c.11083T>C; p.Tyr3695His <sup>D-Fam15</sup><br>ex158; c.22933G>T; p.Glu7645* <sup>D-Fam15</sup>        |                    |
| F6        | int35; c.3879+1G>A; p.?<br>ex156; c.22746del; p.Met7582fs <sup>A-Fam1, D-Fam28</sup>                         |                    |
| F10       | ex182; c.25441C>T; p.Arg8481*<br>ex61; c.8458_8459del; p.Ser2820fs <sup>D-Fam39</sup>                        |                    |
| F14       | ex161; c.23245C>T; p.Arg7749* <sup>D-Fam50</sup><br>ex7; c.410A>G; p.Tyr137Cys <sup>D-Fam50</sup>            |                    |
| F56       | ex38; c.4337G>T; p.Gly1446Val<br>ex158; c.22936C>T; p.Arg7646*                                               |                    |
| F77 *     | ex58; c.7964A>G; p.Tyr2655Cys<br>ex78; c.11628G>A; p.Trp3876*                                                |                    |
| F80       | int22; c.2106+3A>C; p.? <sup>I</sup><br>int3; c.36+2dup; p.? <sup>I</sup>                                    |                    |
| F83       | ex72; c.10528G>C; p.Ala3510Pro <sup>D-Fam25</sup><br>ex18; c.1623del; p.Asp542fs                             |                    |
| F106      | int5; c.294+2T>C; p.? <sup>D-Fam19</sup>                                                                     |                    |

| Family ID | Exon/Intron; variant in cDNA; in protein sequence                                                    | Additional details |
|-----------|------------------------------------------------------------------------------------------------------|--------------------|
|           | ex25; c.2320C>G; p.Tyr773* <sup>D-Fam19</sup>                                                        |                    |
| F107      | int11; c.928-1G>A; p.? <sup>D-Fam20</sup><br>ex18; c.1657_1665delins8; p.Ala553fs <sup>D-Fam20</sup> |                    |
| F112      | int35; c.3879+5G>T; p.?<br>ex70; c.10261C>T; p.Gln3421*                                              |                    |
| F118      | ex152; c.22275C>G; p.Tyr7425* <sup>B-Fam4</sup><br>int43; c.5343+5G>A; p.? <sup>D-Fam16</sup>        |                    |
| F129      | ex13; c.1054_1055del; p.Tyr352*<br>ex38; c.4337G>T; p.Gly1446Val                                     |                    |
| F136      | int28; c.2835+5G>C; p.? <sup>D-Fam54</sup><br>ex164; c.23600_23601del; p.Thr7867fs <sup>B-Fam5</sup> |                    |
| F200      | ex56; c.7641T>A; p.Ser2547Arg<br>int152; c.22378-1G>A; p.?                                           |                    |
| F274      | int56; c.7645-2A>G; p.?<br>ex18; c.1623del; p.Pro541fs                                               |                    |
| F279      | int43; c.5343+5G>A; p.? <sup>Q-P10</sup><br>ex153; c.22378del; p.Val7460fs <sup>Q-P10</sup>          |                    |
| F319      | ex140; c.21076C>T; p.Arg7026*<br>ex129; c.19944G>A; p.Ser6648                                        |                    |
| G33120    | ex6; c.300dup; p.Tyr101fs <sup>Q-P6</sup><br>int49; c.6496-1G>A; p.? <sup>Q-P6</sup>                 |                    |
| PG-F1     | ex58; c.8031_8041del; p.Lys2677fs<br>ex182; c.25424del; p.Thr8475fs                                  |                    |
| SYD-F4    | int29; c.2943+1G>A; p.?<br>int80; c.12018+1G>A; p.?                                                  |                    |
| SYD-F5    | int45; c.5763+5G>A; p.?<br>int25; c.2415+1G>A; p.?                                                   |                    |
| SYD-F6    | ex81; c.12160delT, p.Trp4054fs                                                                       |                    |

| Family ID                                                                                                        | Exon/Intron; variant in cDNA; in protein sequence                                                       | Additional details                                                                  |
|------------------------------------------------------------------------------------------------------------------|---------------------------------------------------------------------------------------------------------|-------------------------------------------------------------------------------------|
|                                                                                                                  | int35; c.3880-2A>G; p.?                                                                                 |                                                                                     |
| Bos153-1                                                                                                         | int13; c.1152+1G>A; p.?<br>int29; c.2943+1G>A; p.?                                                      |                                                                                     |
| EST-F1                                                                                                           | *                                                                                                       |                                                                                     |
| <b>D: Families with the mild form of NM (n = 7)</b>                                                              |                                                                                                         |                                                                                     |
| F333                                                                                                             | ex130; c.19992_19999dup; p.Asp6667fs<br>del ex43-45; c.5238+335_5764-407del; p.Arg1747_Asp1921del       | 2.2 kb del                                                                          |
| F155                                                                                                             | ex54; c.7291G>A; p.Glu2431Lys<br>ex55; c.7523_7526del; p.Ile2508fs <sup>D-Fam41</sup>                   |                                                                                     |
| F202                                                                                                             | int158; c.23011-2A>G; p.? <sup>D-Fam44</sup><br>ex3; c.8A>G; p.Asp3Gly                                  |                                                                                     |
| F231                                                                                                             | ex69; c.10043_10046del; p.Val3348fs <sup>Q-P13</sup><br>ex49; c.6388G>C; p.Ala2130Pro <sup>Q-P13</sup>  |                                                                                     |
| F237                                                                                                             | int155; c.22696-3C>G; p.? <sup>Q-P12</sup><br>ex148; c.21901_21915delinsT; p.Pro7301fs <sup>Q-P12</sup> |                                                                                     |
| F344                                                                                                             | ex61; c.8381A>T; p.Tyr2794Phe<br>int164; c.23662-1G>A; p.?                                              |                                                                                     |
| PG-F2                                                                                                            | int18; c.1674+1G>T; p.?<br>ex159; c.22909G>T; p.Glu7672*                                                |                                                                                     |
| <b>E: NM families with unusual features, i.e. "other forms" of NM (n = 18).</b>                                  |                                                                                                         |                                                                                     |
| <b>Mutations in alternatively spliced exons 63-66 (ALT1), which are always expressed as a block.</b>             |                                                                                                         |                                                                                     |
| F270 (typical)                                                                                                   | ex63; c.8897A>G; p.Tyr2966Cys<br>ex73; c.10701del; p.Lys3567fs                                          | Axial involvement predominant, limb muscles relatively spared in all three families |
| F284 (typical)                                                                                                   | ex151; c.22249A>C; p.Thr7417Pro <sup>D-Fam37</sup><br>ex65; c.9357C>A; p.Cys3119*                       |                                                                                     |
| F386 (severe)                                                                                                    | int32; c.3255+1G>T; p.?<br>ex66; c.9465del; p.Pro3155fs                                                 |                                                                                     |
| <b>Mutation in the triplicate region of eight exons (TRI: three homologous sets: ex82-89, ex90-97, ex98-105)</b> |                                                                                                         |                                                                                     |

| Family ID                                                                                                  | Exon/Intron; variant in cDNA; in protein sequence                                                                                                              | Additional details                                                                                     |
|------------------------------------------------------------------------------------------------------------|----------------------------------------------------------------------------------------------------------------------------------------------------------------|--------------------------------------------------------------------------------------------------------|
| F36 (severe)                                                                                               | ex86/94/102; c.13066del; p.Tyr4356fs <sup>Q-P3</sup><br>ex110; c.17535G>A; p.Glu5845 <sup>Q-P3</sup>                                                           | Cleft palate, oesophageal atresia, clubfeet                                                            |
| F139 (typical)                                                                                             | int29; c.2943+1G>A; p.?<br>int89/97/105; c.13788+1G>A; p.?                                                                                                     | Non-selective muscle weakness                                                                          |
| <b>Mutations in ex143 – 144 (ALT2). Expressed in a mutually exclusive way - never in the same isoform.</b> |                                                                                                                                                                |                                                                                                        |
| F187 (typical)                                                                                             | ex58; c.8031_8041del; p.Lys2677fs <sup>D-Fam51</sup><br>ex143; c.21406C>T; p.Gln7136*                                                                          | Ophthalmoplegia, FSH-like pattern of muscle weakness                                                   |
| F390 (typical)                                                                                             | ex144: c.21506C>A; p.Ser7169*                                                                                                                                  | Unusual pattern of selective weakness, dystrophic biopsy. Difficulties in waking from anaesthesia, HOZ |
| <b>Mutations in ex167-173 (ALT3). Expressed independently of each other</b>                                |                                                                                                                                                                |                                                                                                        |
| F189 (mild)                                                                                                | ex170; c.24218C>A; p.Ser8073* <sup>D-Fam42</sup><br>ex7; c.471delT; p.Ile157fs <sup>D-Fam42</sup>                                                              | Selective axial weakness                                                                               |
| F79 (mild)                                                                                                 | ex171; c.24285_24288dup; p.His8097fs <sup>B-Fam9, D-Fam43</sup>                                                                                                | Rigid neck in F79. Unusual selective weakness pattern in both families, both HOZ mutations             |
| F81 (typical)                                                                                              | ex171; c.24282_24283del; p.Arg8094fs <sup>B-Fam10, D-Fam22</sup>                                                                                               |                                                                                                        |
| F127 (severe)                                                                                              | ex171; c.24294_24297dup; p.Glu8098fs <sup>B-Fam7</sup><br>ex119; c.18676C>T; p.Gln6226* <sup>D-Fam49</sup>                                                     | Fasciculations                                                                                         |
| F206 (intermediate)                                                                                        | ex172; c.24372_24375dup; p.Val8126fs <sup>D-Fam9</sup><br>ex48; c.6078del; p.Lys2026Asnfs*62                                                                   | Tremor/ myoclonus. Fasciculations                                                                      |
| F389 (typical)                                                                                             | ex173; c.24407_24410dup; p.Leu8137fs                                                                                                                           | Unusual pattern of selective weakness                                                                  |
| F382 (typical)                                                                                             | ex173; c.24444_24447del; p.Leu8148fs<br>ex167; c.23910_23911del; p.Arg7970fs                                                                                   | Fasciculations, type 2 predominance                                                                    |
| F324 (severe)                                                                                              | int32; c.3255+1G>A; p.?<br>ex175; c.24632_24633del; p.Pro8211fs                                                                                                | Unusual pattern of selective weakness                                                                  |
| F31 (severe)                                                                                               | ex163; c.23526_23527del; p.Arg7842fs <sup>A-Fam3, D-Fam3, Q-P4&amp;P5-N</sup><br>ex177; c.24792_24793del; p.Glu8265fs <sup>A-Fam3, D-Fam3, Q-P4&amp;P5-N</sup> | Arthrogryposis, micropenis, hypospadias                                                                |
| <b>Mutations in non-alternatively spliced exons</b>                                                        |                                                                                                                                                                |                                                                                                        |
| F316 (typical)                                                                                             | ex68; c.9727_9728del; p.Leu3243fs                                                                                                                              | Fever subsequent to anesthesia on three                                                                |



| Family ID                                                  | Exon/Intron; variant in cDNA; in protein sequence                                                        | Additional details                                                                    |
|------------------------------------------------------------|----------------------------------------------------------------------------------------------------------|---------------------------------------------------------------------------------------|
|                                                            | ex122; c.19097G>T; p.Ser6366Ile                                                                          | occasions, unusually severe feeding problems                                          |
| F309 (mild)                                                | ex78; c.11610C>A; p.Tyr3870*<br>dup 5'-ex51;<br>Chr2.hg19:g.(152,511,101_152,511,615)_(152,614,714_?)dup | Normal muscle strength of upper limbs<br>80 kb dup in <i>NEB</i> (>103 kb altogether) |
| <b>F: NM families with unspecified form of NM (n = 32)</b> |                                                                                                          |                                                                                       |
| PG-F3                                                      | int4; c.78+1G>A, p.?                                                                                     | HOZ                                                                                   |
| PG-F4                                                      | del ex55; c.7431+1916_7536+372del, p.Arg2478_Asp2512del                                                  | HOZ, Ashk. 2.5 kb del                                                                 |
| F114                                                       | int112; c.17737-2A>T; p.?<br>ex144; c.21423del; p.Lys7141fs                                              | ALT2                                                                                  |
| PG-F5                                                      | int66; c.9619-2A>G; p.?<br>ex173; c.24473_24476dup; p.His8259fs                                          | ALT1<br>ALT3                                                                          |
| F385                                                       | int83/91/99; c.12639+1G>A; p.?<br>ex173; c.24493_24494del; p.Ser8165fs                                   | TRI<br>ALT3                                                                           |
| PG-F6                                                      | int85/93/101; c.13059+5G>A; p.?<br>ex170; c.24218C>A, p.Ser8073*                                         | TRI<br>ALT3                                                                           |
| PG-F7                                                      | ex158; c.22936C>T; p.Arg7646*<br>ex170; c.24131_24134dup; p.Tyr8045fs                                    | ALT3                                                                                  |
| PG-F8                                                      | int152; c.22377+2dup; p.?<br>ex172; c.24324_24328dup; p.Leu8106fs                                        | ALT3                                                                                  |
| PG-F9                                                      | ex175; c.24632_24633del; p.Pro8211fs<br>ex172; c.24313_24212dup; p.Leu8102fs                             | ALT3<br>ALT3                                                                          |
| PG-F10                                                     | int32; c.3255+1G>T, p.?<br>ex173; c.24407_24410dup; p.Leu8137fs                                          | ALT3                                                                                  |
| F111                                                       | ex174; c.24559C>T; p.Arg8187*<br>ex161; c.23340del; p.Ala7780fs                                          | ALT3                                                                                  |
| PG-F11                                                     | ex115; c.18211del; p.Leu6070fs<br>ex174; c.24500_24503dup; p.Val8167fs                                   | ALT3                                                                                  |
| PG-F12                                                     | ex61; c.8425C>T; p.Arg2809*                                                                              |                                                                                       |

| Family ID       | Exon/Intron; variant in cDNA; in protein sequence                               | Additional details |
|-----------------|---------------------------------------------------------------------------------|--------------------|
|                 | ex172; c.24317T>A; p.Leu8106*                                                   | ALT3               |
| PG-F13          | int80; c.12018+1G>A; p.?<br>ex173; c.24458_24461dup; p.Met8254fs                | ALT3               |
| PG-F14          | int47; c.6075+2T>G; p.?<br>ex175; c.24654_24655del; p.Arg8218fs                 | ALT3               |
| PG-F15          | int32; c.3255+1G>A; p.?<br>ex175; c.24654_24655del; p.Arg8218fs                 | ALT3               |
| PG-F16          | int32; c.3255+1G>C; p.?<br>ex177; c.24735_24736del; p.Ala8246*                  | ALT3               |
| PG-F17          | int32; c.3255+1G>A; p.?<br>Int82/90/98; c.12534+1G>C; p.?                       | TRIPL              |
| PG-F18          | int18; c.1674+2T>C; p.?<br>ex85/93/101; c.12996G>A; p.Trp4332*                  | TRI                |
| PG-F19          | int32; c.3252_3255+3del; p.Ser1084Argfs*10<br>del ex77; 11289+541_11601+1451del | 2.5 kb del         |
| PG-F20          | ex163; c.23378del; p.Met7828Serfs*25<br>del ex77; 11289+541_11601+1451del       | 2.5 kb del         |
| F267            | ex138; c.20845dup; p.Thr6949Asnfs*16<br>int36; c.3987+1G>A; p.?                 |                    |
| F372            | int8; c.612+1G>A; p.?<br>ex75; c.11164C>T; p.Arg3722*                           |                    |
| F249            | ex110; c.17457G>A; p.Trp5819*<br>int13; c.1152+5G>A; p.?                        |                    |
| CMH000102 & 103 | ex132; c.20253del; p.Ala6751Alafs*8<br>ex35; c.3874A>G; p.Ser1292Gly            |                    |
| PG-F21          | int13; c.1152+1G>A; p.?<br>Int107; c.17013+1G>T; p.?                            |                    |
| PG-F22          | int32; c.3255+2_+3insTT; p.?                                                    |                    |

| Family ID | Exon/Intron; variant in cDNA; in protein sequence                 | Additional details |
|-----------|-------------------------------------------------------------------|--------------------|
|           | ex33; c.3390T>G; p.Tyr1130*                                       |                    |
| PG-F23    | int32; c.3255+1G>A; p.?<br>ex138: c.20803C>T; p.Gln6935*          |                    |
| PG-F24    | int32; c.3255+1G>T; p.?<br>ex58; c.8031_8041del; p.Lys2677Asnfs*7 |                    |
| PG-F25    | int32; c.3255+1G>A; p.?<br>ex118; c.18579+1G>A; p.?               |                    |
| PG-F26    | int43; c.5343+5G>A; p.?<br>ex112; c.17654G>A; p.Trp5885*          |                    |
| EST-F1    | ex53; c.6937C>T; p.Arg2313*<br>ex180; c.25176G>A; p.Trp8392       |                    |

**A-F:** Families with the **A: severe** (n = 24), **B: intermediate** (n = 15), **C: typical** (n = 51), **D: mild** (n = 7), **E: other** (n = 18) and **F: unknown** (n = 32) forms of NM (n = 143; sibs in four families have typical and intermediate forms of NM). If only one variant is indicated, the mutation is homozygous. Mutations/family IDs in previous publications are marked as superscripts following the mutation. Note that three families include patients with both intermediate and typical forms of NM. Reference sequence: c.NM\_001271208.1 (contains all of the 183 exons including the triplicated region).

In Supp. Table S1 and Table 2: Cons = consanguineous; HOZ = homozygous variant, del ex55 = Ashk. = Ashkenazi Jewish Founder mutation; Finnish founder mutations: FIN1 = a missense mutation Ser > Ile in exon 122, FIN2 = a missense mutation Thr > Pro in exon 151, FIN3 = a frameshift mutation in exon 122; ALT1 = mutation in the alternatively spliced exons 63-66 (always expressed together), ALT2 = mutation in the alternatively spliced exons 143 or 144, ALT3 = mutation in the alternatively spliced exons 167-177 (expressed independently), TRI = mutation in the triplicate region.

Published mutations in Supp. Table S1 and Table 2: A = Pelin et al., 1999, B = Pelin et al., 2002, C = Anderson et al., 2004, D = Lehtokari et al., 2006, E = Wallgren-Pettersson et al., 2007, F = Lehtokari and Greenleaf et al., 2009, G = Romero and Lehtokari et al., 2009, H = Lawlor et al., 2011, I = Ochala et al., 2011, J = Lehtokari et al., 2011, K = Kapoor et al., 2013, L = Yonath et al., 2012, M = Böhm et al., 2013, N = Scoto et al., 2013, O = Gajda et al., 2013, P = Kiiski et al., 2013, Q = Malfatti et al., 2014, R = Malfatti et al, in preparation.
